# Supplementary material for: De novo design of non-hydrogen-bonded helical pseudopeptides composed of oxanipecotic acid oligomersElectronic supplementary information (ESI) available: spectral data for synthesized Oxa-oligomers and ab initio data for Nip- and Oxa-compounds; 3D rotatable structures for Nip- and Oxa-tetramers. See http://www.rsc.org/suppdata/cc/b3/b301382k/
Source: Royal Society of Chemistry journal article supplement (doi:10.1039/b301382k), 2003-03-18
Supplement: b301382k.doc [file b301382k.doc]

# **SUPPLEMENTARY INFORMATION**

# **De Novo Design of Non-Hydrogen-Bonded Helical Pseudopeptides Composed of Oxanipecotic Acid Oligomers**

Myung-ryul Lee,+ Kwang Yon Kim,+ Ung-In Cho, Doo Wan Boo* and Injae Shin*

**I. Spectral Data for Oxa-oligomers**

**Boc-(Oxa)2-OBn** **(Oxa-dimer)**: 1H NMR (500 MHz, CDCl3) 7.36 (s, 5 H), 5.35-5.15 (m, 2 H), 4.93 (bs, 1 H), 4.44 (bs, 1 H), 3.97 (d, 2 H, *J* = 6.2 Hz), 3.43 (bs, 1 H), 3.22 (dd, 1 H, *J* = 5.6, 5.8), 2.19-1.60 (m, 8 H), 1.48 (s, 9 H); 13C NMR (125 MHz, CDCl3)  168.5, 168.2, 154.9, 135.2, 128.7, 128.5, 81.4, 79.7, 78.0, 67.2, 45.7, 42.5, 28.3, 26.4, 22.3, 21.3; HRMS (FAB) Calcd for C22H31N2O7 [M + H]+, 435.2131, found 435.2111.

**Boc-(Oxa)4-OBn (Oxa-tetramer)**: 1H NMR (500 MHz, CDCl3)  7.45-7.28 (m, 5 H), 5.25-5.13 (m, 2 H), 5.08 (d, 1 H, *J* = 7.4 Hz), 4.95 (d, 1 H, *J* = 9.4 Hz), 4.91 (d, 1 H, *J* = 9.6 Hz), 4.51 (t, 1 H, *J* = 4.9 Hz), 4.33 (d, 1 H, *J* = 12.3 Hz), 4.25 (d, 1 H, *J* = 12.7 Hz), 3.96 (d, 1 H, *J* = 13.1 Hz), 3.88-3.78 (m, 1 H), 3.68-3.59 (m, 1 H), 3.34 (t, 1 H, *J* = 10.8 Hz), 3.30-3.17 (m, 2 H), 2.18-1.65 (m, 16 H), 1.46 (s, 9 H); 13C NMR (125 MHz, CDCl3) 168.6, 168.3, 167.4, 166.9, 154.8, 134.8, 128.9, 128.3, 81.3, 78.9, 78.6, 67.4, 45.4, 42.4, 42.2, 29.7, 28.3, 26.8, 26.3, 26.2, 26.0, 22.3, 21.8, 21.5, 20.6, 15.3; HRMS (FAB) Calcd for C32H45N4O11 [M + H]+, 661.3085, found 661.3080.

**Boc-(Oxa)6-OBn (Oxa-hexamer)**: 1H NMR (500 MHz, CDCl3) 7.29-7.41 (m, 5 H), 5.23-5.14 (m, 2 H), 5.13-5.08 (m, 1 H), 5.01-4.84 (m, 4 H), 4.52 (t, 1 H, *J* = 4.8 Hz), 4.36-4.08 (m, 4 H), 4.03-3.83 (m, 2 H),3.60-3.49 (m, 1 H), 3.41-3.13 (m, 5 H), 2.18-1.58 (m, 24 H), 1.46 (s, 9 H); HRMS (FAB) Calcd for C42H58N6O15Na [M + Na]+, 909.3858, found 909.3857.

**Boc-(Oxa)8-OBn (Oxa-octamer)**: 1H NMR (500 MHz, CDCl3)  7.41-7.29 (m, 5 H), 5.24-5.14 (m, 2 H), 5.13-5.08 (m, 1 H),5.03-4.83 (m, 6 H), 4.52 (t, 1 H, *J* = 4.3 Hz), 4.35-4.06 (m, 6 H), 4.03-3.95 (m, 1 H), 3.94-3.85 (m, 1 H), 3.60-3.49 (m, 1 H), 3.43-3.12 (m, 7 H), 2.18-1.68 (m, 32 H), 1.46 (s, 9 H); HRMS (FAB) Calcd for C52H72N8O19Na [M + Na]+, 1135.4811, found 1135.4805.

**Boc-(Oxa)10-OBn (Oxa-decamer)**: 1H NMR (500 MHz, CDCl3)  7.41-7.29 (m, 5 H), 5.24-5.14 (m, 2 H), 5.13-5.09 (m, 1 H), 5.03-4.82 (m, 8 H), 4.53 (t, 1 H, *J* = 4.8 Hz), 4.35-4.05 (m, 8 H), 4.03-3.95 (m, 1 H), 3.94-3.86 (m, 1 H), 3.58-3.49 (m, 1 H), 3.43-3.12 (m, 9 H), 2.18-1.68 (m, 40 H),1.46 (s, 9 H); HRMS (FAB) Calcd for C62H87N10O23 [M + H]+, 1339.5946, found 1339.5973.

**Boc-(Oxa)12-OBn (Oxa-dodecamer)**: 1H NMR (500 MHz, CDCl3)  7.41-7.29 (m, 5 H), 5.24-5.15 (m, 2 H), 5.14-5.10 (m, 1 H), 5.03-4.83 (m, 10 H), 4.53 (t, 1 H, *J* = 4.7 Hz), 4.35-3.85 (m, 12 H), 3.58-3.49 (m, 1 H), 3.42-3.08 (m, 11 H), 2.18-1.68 (m, 48 H), 1.49 (s, 9 H); HRMS (FAB) Calcd for C72H100N12O27Na [M + Na]+, 1587.6719, found 1587.6707.

**II. *Ab initio* geometries and energies at RB3LYP/6-31G(*d*)**

**1) Monomers**

**A. Ac-Oxa-OMe**

**a) *cis*-conformer b) *trans*-conformer**

|  | X | Y | Z |
| --- | --- | --- | --- |
| C | -0.002513 | 0.019051 | 0.010341 |
| C | 0.010260 | 0.007433 | 1.545474 |
| C | 1.463040 | -0.014729 | 2.055459 |
| O | 2.188117 | 1.082627 | 1.490350 |
| N | 2.272767 | 0.878773 | 0.094031 |
| C | 0.969089 | 1.077751 | -0.533305 |
| C | 1.497993 | 0.059565 | 3.575974 |
| O | 1.994600 | 1.209559 | 4.045336 |
| C | 2.040525 | 1.319911 | 5.479619 |
| C | 3.521829 | 1.180901 | -0.435151 |
| O | 4.504655 | 1.347029 | 0.261826 |
| O | 1.074811 | -0.845812 | 4.263798 |
| C | 3.582413 | 1.226251 | -1.958243 |
| H | 4.636021 | 1.280856 | -2.234995 |
| H | 3.069982 | 2.112434 | -2.351078 |
| H | 1.034123 | 1.251743 | 5.900994 |
| H | 3.133873 | 0.341290 | -2.421854 |
| H | 1.948191 | -0.956814 | 1.767630 |
| H | 2.659702 | 0.525113 | 5.902901 |
| H | 2.478514 | 2.297528 | 5.679669 |
| H | 1.079082 | 0.980538 | -1.614664 |
| H | 0.604615 | 2.091522 | -0.310467 |
| H | -1.013703 | 0.217748 | -0.363294 |
| H | 0.301933 | -0.964336 | -0.370255 |
| H | -0.472755 | 0.915195 | 1.930019 |
| H | -0.531918 | -0.854767 | 1.945731 |

|  | X | Y | Z |
| --- | --- | --- | --- |
| C | -0.000459 | 0.000918 | -0.000126 |
| C | -0.000441 | -0.000440 | 1.533588 |
| C | 1.436755 | -0.001905 | 2.080410 |
| C | 2.258926 | -1.086828 | 1.381738 |
| O | 2.211549 | -0.897335 | -0.042555 |
| N | 0.869715 | -1.073104 | -0.465326 |
| C | 3.726826 | -1.077144 | 1.805983 |
| O | 4.126023 | -0.565933 | 2.829140 |
| C | 0.706086 | -1.709053 | -1.684389 |
| C | 1.897065 | -2.501494 | -2.183701 |
| O | 4.501657 | -1.747355 | 0.938645 |
| C | 5.898115 | -1.809315 | 1.282849 |
| O | -0.363694 | -1.643570 | -2.273491 |
| H | 1.568631 | -3.098683 | -3.035591 |
| H | 2.698959 | -1.824696 | -2.498215 |
| H | 6.318659 | -0.802946 | 1.351927 |
| H | 2.312575 | -3.145224 | -1.403496 |
| H | 1.851807 | -2.084082 | 1.611919 |
| H | 6.033516 | -2.319297 | 2.240152 |
| H | 6.370863 | -2.369870 | 0.476518 |
| H | -0.988983 | -0.194605 | -0.417673 |
| H | 0.361651 | 0.963024 | -0.391652 |
| H | -0.547619 | 0.873014 | 1.905705 |
| H | -0.532099 | -0.893661 | 1.886246 |
| H | 1.918692 | 0.965661 | 1.894943 |
| H | 1.453635 | -0.166876 | 3.161888 |

**B. Ac-Nip-OMe**

**a) *cis*-conformer b) *trans*-conformer**

|  | X | Y | Z |
| --- | --- | --- | --- |
| C | -0.000620 | -0.000823 | 0.000439 |
| C | -0.000380 | -0.000561 | 1.535683 |
| C | 1.448691 | -0.001984 | 2.076551 |
| C | 2.257510 | 1.156611 | 1.462764 |
| N | 2.203780 | 1.104303 | 0.006925 |
| C | 0.854571 | 1.142798 | -0.558120 |
| C | 1.482974 | 0.075834 | 3.592701 |
| O | 0.907452 | -1.011276 | 4.152155 |
| C | 0.879115 | -1.024708 | 5.589981 |
| C | 3.290062 | 1.032136 | -0.837760 |
| O | 3.159870 | 0.992941 | -2.057290 |
| O | 1.957709 | 0.987185 | 4.238208 |
| C | 4.676995 | 1.002702 | -0.204441 |
| H | 5.400114 | 0.948539 | -1.018744 |
| H | 4.876424 | 1.902212 | 0.388758 |
| H | 0.322663 | -0.164488 | 5.971169 |
| H | 4.814337 | 0.133545 | 0.448899 |
| H | 3.289319 | 1.120803 | 1.808142 |
| H | 1.837937 | 2.109461 | 1.815624 |
| H | 1.915005 | -0.953355 | 1.784404 |
| H | 0.382292 | -1.955806 | 5.863574 |
| H | 1.894659 | -0.997368 | 5.993707 |
| H | 0.955948 | 1.083255 | -1.641527 |
| H | 0.391599 | 2.110113 | -0.306762 |
| H | -1.026885 | 0.091508 | -0.375760 |
| H | 0.395728 | -0.955631 | -0.369340 |
| H | -0.514882 | 0.899542 | 1.902992 |
| H | -0.544436 | -0.864566 | 1.929721 |

|  | X | Y | Z |
| --- | --- | --- | --- |
| C | -0.003782 | -0.001438 | 0.000103 |
| N | -0.000509 | 0.000344 | 1.459336 |
| C | 1.329121 | -0.000813 | 2.062387 |
| C | 2.143600 | -1.210277 | 1.578731 |
| C | 2.185082 | -1.272742 | 0.045741 |
| C | 0.761298 | -1.227706 | -0.551167 |
| C | -1.198440 | -0.089504 | 2.135498 |
| C | -1.149007 | -0.100412 | 3.659572 |
| C | 0.829419 | -1.131878 | -2.064226 |
| O | 1.372847 | -0.231270 | -2.670674 |
| O | 0.206540 | -2.167340 | -2.666107 |
| C | 0.215209 | -2.139123 | -4.104201 |
| O | -2.272141 | -0.150070 | 1.545191 |
| H | -2.179657 | -0.139721 | 4.013308 |
| H | -0.668627 | 0.798373 | 4.062320 |
| H | 1.240953 | -2.155366 | -4.482021 |
| H | -0.609461 | -0.972103 | 4.047433 |
| H | -1.045018 | -0.002598 | -0.322322 |
| H | 0.481665 | 0.911927 | -0.369846 |
| H | 0.213105 | -2.135362 | -0.278097 |
| H | -0.324444 | -3.033333 | -4.416848 |
| H | -0.284077 | -1.239097 | -4.472324 |
| H | 1.245015 | -0.002435 | 3.149114 |
| H | 1.847772 | 0.927824 | 1.776951 |
| H | 3.161911 | -1.149861 | 1.982483 |
| H | 1.689209 | -2.127151 | 1.977549 |
| H | 2.751033 | -0.419183 | -0.349376 |
| H | 2.704561 | -2.180637 | -0.283808 |

**C. Relative energies (kcal/mol) of monomers.**

|  |  | **Ac-Oxa-OMe** | | |  | **Ac-Nip-OMe** | | |
| --- | --- | --- | --- | --- | --- | --- | --- | --- |
|  |  | ***cis*-conformer** |  | ***trans*-conformer** |  | ***cis*-conformer** |  | ***trans*-conformer** |
| ***E****el* |  | 0.0 |  | 5.8 |  | 0.0 |  | 0.3 |
| ***E****el,ZPVE* |  | 0.0 |  | 5.9 |  | 0.0 |  | 0.4 |
| ***H****(298K)* |  | 0.0 |  | 5.9 |  | 0.0 |  | 0.4 |
| ***G****(298K)* |  | 0.0 |  | 5.8 |  | 0.0 |  | 0.0 |

**2) Dimers**

**A. Potential energy surface scan for dimers along **-angle.**

**a) Oxa-dimer b) Nip-dimer**

| **** (degree)** |  | ***E* (kcal/mol)** |
| --- | --- | --- |
| -180 |  | 1.41 |
| -170 |  | 0.37 |
| -160 |  | 0.04 |
| **-158 (L1)** |  | **0.00** |
| -150 |  | 0.10 |
| -140 |  | 0.34 |
| -130 |  | 0.61 |
| -120 |  | 0.77 |
| -110 |  | 0.65 |
| -100 |  | 0.43 |
| -90 |  | 0.25 |
| **-84 (L2)** |  | **0.00** |
| -80 |  | 0.08 |
| -70 |  | 0.44 |
| -60 |  | 1.52 |
| -50 |  | 3.18 |
| -40 |  | 5.37 |
| -30 |  | 7.50 |
| -20 |  | 8.92 |
| -10 |  | 9.20 |
| 0 |  | 8.93 |
| 10 |  | 8.47 |
| 20 |  | 7.74 |
| 30 |  | 6.87 |
| 40 |  | 6.10 |
| 50 |  | 5.64 |
| 60 |  | 5.52 |
| **61 (R1)** |  | **5.49** |
| 70 |  | 5.58 |
| 80 |  | 5.78 |
| 90 |  | 6.27 |
| 100 |  | 7.11 |
| 110 |  | 8.01 |
| 120 |  | 8.66 |
| 130 |  | 9.05 |
| 140 |  | 9.37 |
| 150 |  | 9.79 |
| 160 |  | 8.02 |
| 170 |  | 3.14 |

| **** (degree)** |  | ***E* (kcal/mol)** |
| --- | --- | --- |
| -180 |  | 1.27 |
| -170 |  | 1.00 |
| **-165 (L1)** |  | **0.97** |
| -160 |  | 0.99 |
| -150 |  | 1.15 |
| -140 |  | 1.23 |
| -130 |  | 1.16 |
| -120 |  | 0.99 |
| -110 |  | 0.78 |
| -100 |  | 0.51 |
| -90 |  | 0.21 |
| -80 |  | 0.02 |
| **-79 (L2)** |  | **0.00** |
| -70 |  | 0.10 |
| -60 |  | 0.43 |
| -50 |  | 1.02 |
| -40 |  | 1.87 |
| -30 |  | 2.87 |
| -20 |  | 3.71 |
| -10 |  | 3.33 |
| 0 |  | 2.72 |
| 10 |  | 2.05 |
| 20 |  | 1.36 |
| 30 |  | 0.69 |
| 40 |  | 0.24 |
| 50 |  | 0.00 |
| **54 (R1)** |  | **0.00** |
| 60 |  | 0.01 |
| 70 |  | 0.39 |
| 80 |  | 1.15 |
| 90 |  | 2.28 |
| 100 |  | 3.64 |
| 110 |  | 4.90 |
| 120 |  | 5.93 |
| 130 |  | 6.46 |
| 140 |  | 6.62 |
| 150 |  | 4.67 |
| 160 |  | 3.38 |
| 170 |  | 2.14 |

**B. Three conformers of Oxa- and Nip-dimers (L1, L2, R1).**

**a) Oxa-dimer**

**i) L1 conformer**

|  | X | Y | Z |
| --- | --- | --- | --- |
| N | -0.068811 | -0.075589 | 0.025612 |
| O | -0.029750 | -0.034401 | 1.441529 |
| C | 1.350070 | 0.014888 | 1.880786 |
| C | 2.066814 | -1.261189 | 1.423923 |
| C | 1.920089 | -1.463960 | -0.092899 |
| C | 0.452267 | -1.327982 | -0.510042 |
| C | 1.295385 | 0.182277 | 3.391179 |
| C | -1.103557 | 0.612233 | -0.583118 |
| O | -1.398874 | 0.392584 | -1.746945 |
| H | 1.820097 | 0.892175 | 1.412253 |
| H | 1.625425 | -2.113330 | 1.958860 |
| H | 3.125201 | -1.210202 | 1.708303 |
| H | 2.301391 | -2.448179 | -0.388779 |
| H | 2.511739 | -0.709497 | -0.627168 |
| H | -0.144458 | -2.167198 | -0.122592 |
| H | 0.326545 | -1.283423 | -1.592543 |
| H | 0.763098 | 1.099259 | 3.662727 |
| H | 0.780285 | -0.666117 | 3.854192 |

|  | X | Y | Z |
| --- | --- | --- | --- |
| H | 2.309944 | 0.236200 | 3.800198 |
| C | -1.761305 | 1.704313 | 0.264064 |
| C | -0.862655 | 2.948803 | 0.400174 |
| C | -1.648573 | 4.077825 | 1.084119 |
| C | -3.034350 | 4.237850 | 0.449556 |
| N | -3.718425 | 2.939983 | 0.471960 |
| O | -2.959392 | 2.064893 | -0.413294 |
| C | -5.038024 | 2.991329 | -0.140682 |
| H | -2.010262 | 1.314176 | 1.257744 |
| H | -0.560328 | 3.257795 | -0.608539 |
| H | 0.044710 | 2.707486 | 0.964191 |
| H | -1.778055 | 3.842745 | 2.148294 |
| H | -1.096239 | 5.023176 | 1.021044 |
| H | -2.952400 | 4.621107 | -0.582595 |
| H | -3.644585 | 4.939822 | 1.030526 |
| H | -5.012526 | 3.375264 | -1.173557 |
| H | -5.671454 | 3.641416 | 0.471364 |
| H | -5.461687 | 1.984274 | -0.147603 |

**ii) L2 conformer**

|  | X | Y | Z |
| --- | --- | --- | --- |
| H | 0.457540 | 1.017016 | 1.243323 |
| H | 3.766864 | -1.878659 | -2.496840 |
| H | 3.400267 | -2.539611 | -0.884682 |
| H | 5.331906 | -1.019372 | -0.611309 |
| H | 4.512212 | 0.249546 | -1.528731 |
| H | 4.274390 | 0.800952 | 0.863532 |
| H | 3.703170 | -0.831461 | 1.232162 |
| H | 2.228095 | 1.214695 | -0.502918 |
| H | -3.976675 | -1.115409 | -2.371410 |
| H | -2.948444 | -2.390917 | -3.077386 |
| H | -0.424722 | 0.233549 | -4.421144 |
| H | -0.710153 | -1.505281 | -4.455625 |
| H | -0.205150 | 0.148044 | -1.931336 |
| H | -1.920908 | -2.266090 | 0.439192 |
| H | -2.530795 | 0.649303 | -3.225093 |
| H | -2.921319 | -0.413086 | -4.582327 |
| H | -2.630025 | -3.334165 | -0.805642 |
| H | 1.970508 | 1.598272 | 1.975041 |

|  | X | Y | Z |
| --- | --- | --- | --- |
| C | -2.599388 | -2.302956 | -0.416496 |
| H | -3.603211 | -2.011558 | -0.090866 |
| N | -2.149427 | -1.339086 | -1.409506 |
| O | -0.818185 | -1.812823 | -1.775253 |
| C | -0.170713 | -0.777757 | -2.519451 |
| C | -0.874058 | -0.598124 | -3.865336 |
| C | -2.373754 | -0.357353 | -3.633935 |
| C | -2.946249 | -1.376421 | -2.641849 |
| C | 1.284784 | -1.238673 | -2.691203 |
| O | 1.716953 | -1.702492 | -3.740499 |
| N | 2.102585 | -1.067952 | -1.604901 |
| O | 1.523791 | -0.728471 | -0.369459 |
| C | 2.252685 | 0.381688 | 0.215387 |
| C | 3.703665 | -0.046351 | 0.463608 |
| C | 4.351674 | -0.577627 | -0.825349 |
| C | 3.443413 | -1.621094 | -1.487487 |
| C | 1.491343 | 0.747095 | 1.479524 |
| H | 1.477286 | -0.097151 | 2.177052 |

**iii) R1 conformer**

|  | X | Y | Z |
| --- | --- | --- | --- |
| N | -0.240890 | -0.198409 | 0.064792 |
| O | -0.142311 | -0.125439 | 1.457605 |
| C | 1.249893 | 0.027609 | 1.856208 |
| C | 2.039236 | -1.194871 | 1.375419 |
| C | 1.863163 | -1.409729 | -0.137263 |
| C | 0.374346 | -1.382392 | -0.511329 |
| C | 1.221763 | 0.193053 | 3.365948 |
| C | -0.823569 | 0.810099 | -0.652456 |
| O | -0.979058 | 0.710559 | -1.866291 |
| H | 1.624587 | 0.941356 | 1.378738 |
| H | 1.678959 | -2.077454 | 1.922184 |
| H | 3.099863 | -1.068067 | 1.626427 |
| H | 2.308107 | -2.362835 | -0.447001 |
| H | 2.380016 | -0.613532 | -0.688410 |
| H | -0.141592 | -2.269551 | -0.120167 |
| H | 0.214627 | -1.326876 | -1.588826 |
| H | 0.633893 | 1.074194 | 3.639753 |
| H | 0.777627 | -0.686600 | 3.844700 |

|  | X | Y | Z |
| --- | --- | --- | --- |
| H | 2.239764 | 0.319026 | 3.750360 |
| C | -1.336942 | 2.048867 | 0.093089 |
| C | -2.569707 | 1.791674 | 0.974448 |
| C | -2.966197 | 3.098782 | 1.679227 |
| C | -1.742310 | 3.768854 | 2.314946 |
| N | -0.709745 | 3.951886 | 1.288657 |
| O | -0.285779 | 2.614010 | 0.885914 |
| C | 0.501334 | 4.566637 | 1.807186 |
| H | -1.589528 | 2.759302 | -0.701620 |
| H | -2.319568 | 1.022846 | 1.712045 |
| H | -3.395767 | 1.416380 | 0.358428 |
| H | -3.402463 | 3.793855 | 0.950872 |
| H | -3.726094 | 2.906943 | 2.446103 |
| H | -1.358227 | 3.167929 | 3.158366 |
| H | -2.002144 | 4.764727 | 2.693460 |
| H | 0.931464 | 4.014390 | 2.660195 |
| H | 0.254665 | 5.583628 | 2.128107 |
| H | 1.242288 | 4.617923 | 1.005636 |

**b) Nip-dimer**

**i) L1-conformer**

|  | X | Y | Z |
| --- | --- | --- | --- |
| H | -1.756668 | -4.839630 | 0.828506 |
| H | -1.836075 | -3.678574 | 3.085846 |
| H | -2.441925 | -2.647278 | 1.786896 |
| H | 0.355300 | -2.538971 | 3.035477 |
| H | -0.915451 | -1.307892 | 3.194321 |
| H | 1.053116 | -4.838684 | -0.693222 |
| H | 0.525055 | -3.788620 | -2.019409 |
| H | -0.528656 | -5.091492 | -1.446030 |
| H | 1.250778 | 0.213928 | -0.409561 |
| H | -1.660568 | 1.091751 | -0.722916 |
| H | -0.969360 | -0.368134 | -1.427505 |
| H | 0.575287 | 0.976730 | -2.826950 |
| H | -1.080261 | 1.538696 | -3.091171 |
| H | -0.739319 | 3.455734 | -1.588608 |
| H | 0.554550 | 3.426483 | -2.801331 |
| H | -0.167389 | 2.650589 | 0.748520 |
| H | 1.504852 | 2.169922 | 1.049744 |
| H | 0.906845 | 4.839172 | -0.165451 |
| H | 2.084549 | 4.638931 | -1.488861 |
| H | 2.494492 | 4.093735 | 0.149109 |

**ii) L2-conformer**

|  | X | Y | Z |
| --- | --- | --- | --- |
| N | -0.023773 | -1.385956 | 1.328003 |
| C | 0.545364 | -2.280594 | 0.323425 |
| C | -0.454620 | -3.372940 | -0.108322 |
| C | -0.987320 | -4.116623 | 1.128723 |
| C | -1.541458 | -3.140732 | 2.175949 |
| C | -0.504593 | -2.069153 | 2.532059 |
| C | 0.184906 | -4.324326 | -1.124786 |
| C | -0.153000 | -0.016724 | 1.241684 |
| O | -0.673615 | 0.633545 | 2.147720 |
| C | 0.341827 | 0.690491 | -0.025131 |
| C | -0.735703 | 0.662369 | -1.132126 |
| C | -0.276016 | 1.477417 | -2.347382 |
| C | 0.151093 | 2.888351 | -1.934800 |
| N | 1.185303 | 2.839279 | -0.902405 |
| C | 0.707367 | 2.148727 | 0.298279 |
| C | 1.683670 | 4.168579 | -0.583786 |
| H | 1.441605 | -2.765366 | 0.745865 |
| H | 0.870087 | -1.711639 | -0.547256 |
| H | -1.303085 | -2.862411 | -0.588608 |
| H | -0.166168 | -4.700775 | 1.573212 |

|  | X | Y | Z |
| --- | --- | --- | --- |
| C | 1.945343 | 3.415405 | -1.010483 |
| N | 0.770416 | 2.620987 | -1.336685 |
| C | 0.358337 | 1.790787 | -0.206589 |
| C | -0.800552 | 0.848694 | -0.598373 |
| C | -1.983185 | 1.673187 | -1.130875 |
| C | -1.517563 | 2.600082 | -2.259949 |
| C | -0.330902 | 3.458664 | -1.815155 |
| C | -1.221863 | 0.013275 | 0.618759 |
| O | -2.146423 | 0.391953 | 1.336044 |
| N | -0.523300 | -1.140945 | 0.900955 |
| C | 0.610352 | -1.688995 | 0.159958 |
| C | 0.345734 | -3.135529 | -0.302872 |
| C | -0.054321 | -4.002350 | 0.903778 |
| C | -1.213440 | -3.374710 | 1.691589 |
| C | -0.897293 | -1.925949 | 2.080902 |
| C | 1.561142 | -3.702255 | -1.044052 |
| H | 2.264465 | 3.979507 | -1.893921 |
| H | 2.442535 | -3.736038 | -0.390747 |
| H | 1.817871 | -3.094620 | -1.920349 |
| H | 0.034470 | 2.402847 | 0.660202 |

|  | X | Y | Z |
| --- | --- | --- | --- |
| H | 1.228470 | 1.209213 | 0.122177 |
| H | 1.498352 | -1.681473 | 0.814453 |
| H | -1.751266 | -1.431351 | 2.542465 |
| H | -0.060181 | -1.907425 | 2.797028 |
| H | -1.422150 | -3.957443 | 2.597595 |
| H | -2.127487 | -3.386566 | 1.083282 |
| H | -0.318558 | -5.013641 | 0.568741 |
| H | 0.819200 | -4.110535 | 1.565659 |
| H | -0.506836 | -3.100952 | -0.997559 |
| H | 0.038559 | 4.059845 | -2.654892 |
| H | -0.663971 | 4.170120 | -1.029938 |
| H | -2.780746 | 1.006042 | -1.478851 |
| H | -2.404404 | 2.254852 | -0.303665 |
| H | -0.443741 | 0.206314 | -1.410950 |
| H | 0.843796 | -1.058228 | -0.697327 |
| H | 2.768509 | 2.756012 | -0.712753 |
| H | -1.214218 | 2.006363 | -3.132614 |
| H | -2.339508 | 3.251862 | -2.580933 |
| H | 1.772385 | 4.137909 | -0.188309 |
| H | 1.367294 | -4.723495 | -1.391159 |

**iii) R1-conformer**

|  | X | Y | Z |
| --- | --- | --- | --- |
| N | 1.505142 | -0.755096 | 0.864990 |
| C | 0.841064 | -1.358185 | -0.286758 |
| C | -0.274445 | -2.334885 | 0.136688 |
| C | 0.286606 | -3.381683 | 1.114273 |
| C | 1.025070 | -2.718048 | 2.285049 |
| C | 2.091600 | -1.739182 | 1.781189 |
| C | -0.925888 | -2.979904 | -1.091019 |
| C | 1.652130 | 0.585022 | 1.156296 |
| O | 2.254227 | 0.944626 | 2.167618 |
| C | 1.076920 | 1.680084 | 0.236618 |
| C | 1.712845 | 1.782500 | -1.165848 |
| C | 1.157471 | 3.018600 | -1.887787 |
| C | -0.373840 | 3.013657 | -1.887741 |
| N | -0.897797 | 2.946472 | -0.524063 |
| C | -0.463821 | 1.730026 | 0.162003 |
| C | -2.344696 | 3.089050 | -0.490463 |
| H | 1.590714 | -1.908798 | -0.880203 |
| H | 0.428848 | -0.585556 | -0.930786 |
| H | -1.034439 | -1.743271 | 0.669083 |
| H | 0.983368 | -4.038193 | 0.569733 |

|  | X | Y | Z |
| --- | --- | --- | --- |
| H | -0.523500 | -4.024551 | 1.482056 |
| H | 1.498947 | -3.476563 | 2.920761 |
| H | 0.311249 | -2.170135 | 2.914490 |
| H | 2.878738 | -2.292450 | 1.244278 |
| H | 2.556534 | -1.186951 | 2.596634 |
| H | -0.194138 | -3.559464 | -1.668396 |
| H | -1.357849 | -2.225754 | -1.760284 |
| H | -1.729904 | -3.663071 | -0.794769 |
| H | 1.366760 | 2.588470 | 0.773361 |
| H | 1.502502 | 0.892670 | -1.771744 |
| H | 2.803589 | 1.848404 | -1.072815 |
| H | 1.505692 | 3.928116 | -1.382675 |
| H | 1.525085 | 3.055771 | -2.920776 |
| H | -0.742081 | 2.164948 | -2.505035 |
| H | -0.752457 | 3.931244 | -2.353683 |
| H | -0.879150 | 0.830154 | -0.334564 |
| H | -0.872589 | 1.746002 | 1.179535 |
| H | -2.878754 | 2.273926 | -1.019638 |
| H | -2.632507 | 4.038193 | -0.955780 |
| H | -2.691238 | 3.100708 | 0.548813 |

**3) Tetramers**

**A. Low-energy conformers of Oxa-tetramer.**

|  | X | Y | Z |
| --- | --- | --- | --- |
| C | 0.004632 | 0.002355 | -0.011214 |
| C | -0.003743 | 0.003842 | 1.515861 |
| O | 1.365848 | 0.012738 | 1.981264 |
| N | 1.948388 | -1.217079 | 1.616579 |
| C | 2.168134 | -1.313447 | 0.180609 |
| C | 0.804257 | -1.211691 | -0.521245 |
| C | -0.655246 | 1.257871 | 2.117003 |
| O | -0.948556 | 2.245780 | 1.451865 |
| C | 2.745667 | -1.836872 | 2.548313 |
| O | 2.492895 | -1.392468 | 3.797530 |
| C | 3.307217 | -1.970259 | 4.825347 |
| N | -0.930351 | 1.183949 | 3.455412 |
| O | -0.390361 | 0.103381 | 4.170875 |
| C | -1.430724 | -0.466614 | 5.009510 |
| C | -1.831296 | 0.558825 | 6.064663 |
| C | -2.299104 | 1.847338 | 5.362665 |
| C | -1.281954 | 2.311073 | 4.309044 |
| C | -0.768651 | -1.721096 | 5.591646 |
| O | -0.212963 | -1.742534 | 6.681881 |
| N | -0.863570 | -2.860742 | 4.823963 |
| O | -1.223676 | -2.690080 | 3.468843 |
| C | -2.118645 | -3.761298 | 3.083809 |
| C | -1.380908 | -5.095073 | 3.169548 |
| C | -0.804422 | -5.282577 | 4.583114 |
| C | -0.023393 | -4.038194 | 5.022631 |
| C | -2.527114 | -3.407921 | 1.645677 |
| O | -1.968030 | -3.876764 | 0.663606 |
| N | -3.594482 | -2.550223 | 1.510600 |
| C | -3.916810 | -1.859788 | 0.264264 |
| C | -5.432676 | -1.643728 | 0.199097 |
| C | -5.942732 | -0.990870 | 1.493654 |
| C | -5.403352 | -1.758510 | 2.712235 |
| O | -3.969245 | -1.814256 | 2.656196 |
| C | -5.750628 | -1.083159 | 4.032975 |
| O | -7.081329 | -1.134330 | 4.227520 |
| C | -7.556603 | -0.509838 | 5.436962 |

**a) L2-L2-L2 conformer**

|  | X | Y | Z |
| --- | --- | --- | --- |
| O | -4.964433 | -0.568432 | 4.793947 |
| O | 3.535797 | -2.723016 | 2.263938 |
| H | -3.549391 | -2.489314 | -0.546903 |
| H | -3.381669 | -0.900128 | 0.237776 |
| H | -5.678862 | -1.016554 | -0.664618 |
| H | -5.926365 | -2.612933 | 0.053231 |
| H | -7.036364 | -0.974161 | 1.526327 |
| H | -5.588191 | 0.045789 | 1.557420 |
| H | -5.805014 | -2.781337 | 2.721076 |
| H | 0.238385 | -4.062460 | 6.081259 |
| H | 0.894815 | -3.922747 | 4.430927 |
| H | -0.145327 | -6.157452 | 4.610645 |
| H | -1.617470 | -5.462655 | 5.298444 |
| H | -2.064274 | -5.913513 | 2.914003 |
| H | -0.584401 | -5.090985 | 2.418693 |
| H | -2.987827 | -3.737383 | 3.749694 |
| H | -1.681991 | 3.089055 | 3.656596 |
| H | -0.367845 | 2.688167 | 4.789181 |
| H | -2.634470 | 0.152477 | 6.689113 |
| H | -0.968367 | 0.747958 | 6.711991 |
| H | -2.283279 | -0.734854 | 4.381084 |
| H | 2.657997 | -2.269454 | -0.009907 |
| H | 2.837607 | -0.503059 | -0.144109 |
| H | 0.955859 | -1.140329 | -1.604833 |
| H | 0.237692 | -2.131534 | -0.327428 |
| H | -1.022241 | -0.022193 | -0.395291 |
| H | 0.450346 | 0.942836 | -0.352477 |
| H | -0.488500 | -0.891578 | 1.916744 |
| H | 4.326138 | -1.572989 | 4.774931 |
| H | 2.830636 | -1.681149 | 5.762797 |
| H | 3.347290 | -3.058093 | 4.730584 |
| H | -3.262736 | 1.659707 | 4.874043 |
| H | -2.450804 | 2.648365 | 6.095779 |
| H | -7.303155 | 0.553037 | 5.440988 |
| H | -8.637306 | -0.649007 | 5.429290 |
| H | -7.110738 | -0.989257 | 6.311708 |

**b) L2-L2-L1 conformer**

|  | X | Y | Z |
| --- | --- | --- | --- |
| C | 0.008601 | 0.163403 | -0.022988 |
| C | -0.003523 | 0.125911 | 1.502795 |
| O | 1.367058 | 0.098434 | 1.978121 |
| N | 1.933785 | -1.126169 | 1.580654 |
| C | 2.153882 | -1.188867 | 0.143051 |
| C | 0.793698 | -1.048560 | -0.558428 |
| C | -0.615466 | 1.385027 | 2.130066 |
| O | -0.849765 | 2.408681 | 1.500288 |
| C | 2.700204 | -1.799251 | 2.497145 |
| O | 2.454614 | -1.384019 | 3.759486 |
| C | 3.255943 | -2.009009 | 4.768840 |
| N | -0.937612 | 1.281430 | 3.462741 |
| O | -0.403976 | 0.182646 | 4.163372 |
| C | -1.429430 | -0.358772 | 5.026114 |
| C | -1.782483 | 0.675976 | 6.091464 |
| C | -2.221047 | 1.985138 | 5.409295 |
| C | -1.211848 | 2.416332 | 4.335290 |
| C | -0.785696 | -1.627424 | 5.601555 |
| O | -0.199321 | -1.647717 | 6.675521 |
| N | -0.935890 | -2.770651 | 4.851474 |
| O | -1.328633 | -2.603812 | 3.505648 |
| C | -2.272626 | -3.641129 | 3.179085 |
| C | -1.568082 | -5.006330 | 3.259407 |
| C | -0.950561 | -5.193765 | 4.654971 |
| C | -0.122058 | -3.966249 | 5.048098 |
| C | -2.767415 | -3.305380 | 1.769438 |
| O | -2.217916 | -2.497337 | 1.036004 |
| N | -3.857070 | -4.030164 | 1.331926 |
| C | -4.667941 | -3.607287 | 0.191404 |
| C | -5.344369 | -4.841834 | -0.413389 |
| C | -6.066552 | -5.654969 | 0.673478 |
| C | -5.117013 | -5.896378 | 1.857410 |
| O | -4.629812 | -4.639530 | 2.351288 |
| C | -5.781445 | -6.584565 | 3.044656 |
| O | -6.261858 | -7.783862 | 2.659191 |
| C | -6.908316 | -8.550939 | 3.693724 |

|  | X | Y | Z |
| --- | --- | --- | --- |
| O | -5.860711 | -6.137370 | 4.163169 |
| O | 3.465352 | -2.702135 | 2.193716 |
| H | -3.992102 | -3.116267 | -0.509702 |
| H | -5.414355 | -2.874720 | 0.530222 |
| H | -6.052305 | -4.530975 | -1.189541 |
| H | -4.581975 | -5.466393 | -0.895943 |
| H | -6.417611 | -6.614767 | 0.283241 |
| H | -6.941283 | -5.102715 | 1.040235 |
| H | -4.264545 | -6.509917 | 1.531201 |
| H | 0.169938 | -3.979640 | 6.098865 |
| H | 0.781046 | -3.885267 | 4.428164 |
| H | -0.316537 | -6.087446 | 4.672782 |
| H | -1.748717 | -5.339949 | 5.393534 |
| H | -2.281729 | -5.806737 | 3.042145 |
| H | -0.784449 | -5.031117 | 2.491776 |
| H | -3.107151 | -3.604297 | 3.888512 |
| H | -1.595122 | 3.217659 | 3.701705 |
| H | -0.270817 | 2.749239 | 4.795909 |
| H | -2.577546 | 0.291044 | 6.741139 |
| H | -0.898322 | 0.834195 | 6.717509 |
| H | -2.300236 | -0.613748 | 4.412967 |
| H | 2.631850 | -2.146056 | -0.071128 |
| H | 2.835920 | -0.379660 | -0.157758 |
| H | 0.949094 | -0.956041 | -1.640123 |
| H | 0.209611 | -1.959748 | -0.381776 |
| H | -1.019194 | 0.150936 | -0.401478 |
| H | 0.465951 | 1.105338 | -0.344885 |
| H | -0.516436 | -0.766894 | 1.869777 |
| H | 4.289422 | -1.651772 | 4.714485 |
| H | 2.800580 | -1.716908 | 5.715951 |
| H | 3.253310 | -3.096232 | 4.657291 |
| H | -3.201949 | 1.845130 | 4.936354 |
| H | -2.328996 | 2.784084 | 6.151842 |
| H | -7.767404 | -8.005484 | 4.091813 |
| H | -7.227142 | -9.475642 | 3.213198 |
| H | -6.208146 | -8.758955 | 4.506552 |

**c) L2-L1-L1 conformer**

|  | X | Y | Z |
| --- | --- | --- | --- |
| O | -0.075103 | -0.097708 | 0.170659 |
| N | -0.176482 | -0.071170 | 1.585703 |
| C | 1.132243 | -0.082305 | 2.236728 |
| C | 1.863414 | -1.371472 | 1.845012 |
| C | 1.861932 | -1.559763 | 0.319186 |
| C | 0.443212 | -1.383918 | -0.221204 |
| C | -1.251036 | 0.637034 | 2.089765 |
| O | -1.279110 | 0.997432 | 3.254082 |
| C | 0.371602 | -1.456347 | -1.746455 |
| O | 1.254455 | -1.905386 | -2.441804 |
| C | -2.407737 | 0.863410 | 1.110848 |
| O | -3.289767 | 1.783354 | 1.781035 |
| N | -4.304368 | 2.161787 | 0.871345 |
| C | -5.219769 | 1.066347 | 0.568422 |
| C | -4.421759 | -0.072684 | -0.075223 |
| C | -3.183166 | -0.419465 | 0.767285 |
| C | -4.703070 | 3.482503 | 0.909302 |
| O | -5.734102 | 3.843555 | 0.364673 |
| C | -3.716925 | 4.448481 | 1.573229 |
| O | -4.500101 | 5.600714 | 1.948260 |
| N | -3.658599 | 6.497203 | 2.631624 |
| C | -2.647887 | 7.103751 | 1.777254 |
| C | -1.753237 | 5.993351 | 1.213379 |
| C | -2.609579 | 4.876719 | 0.594267 |
| C | -4.100186 | 7.042166 | 3.809259 |
| O | -3.505259 | 7.973564 | 4.338471 |
| C | -5.338494 | 6.383935 | 4.435843 |
| C | -5.518717 | 6.775439 | 5.903261 |
| C | -6.877572 | 6.275778 | 6.427203 |
| C | -8.012238 | 6.630098 | 5.454584 |
| N | -7.612002 | 6.190682 | 4.125884 |
| O | -6.461549 | 6.874176 | 3.675305 |
| C | -8.517159 | 5.796719 | 3.161142 |
| O | -9.661663 | 5.468353 | 3.429133 |
| O | -7.954107 | 5.756148 | 1.944024 |
| C | -8.784325 | 5.225737 | 0.904003 |

|  | X | Y | Z |
| --- | --- | --- | --- |
| O | -0.808981 | -1.009592 | -2.206223 |
| C | -0.974364 | -1.066819 | -3.637216 |
| H | 0.948566 | -0.015123 | 3.309828 |
| H | 1.701604 | 0.804404 | 1.922638 |
| H | 2.890886 | -1.340734 | 2.223699 |
| H | 1.363897 | -2.222789 | 2.324910 |
| H | 2.242054 | -2.546521 | 0.038304 |
| H | 2.508434 | -0.816521 | -0.162124 |
| H | -0.222398 | -2.161480 | 0.184704 |
| H | -5.985001 | 1.469309 | -0.096207 |
| H | -5.701749 | 0.731589 | 1.498097 |
| H | -5.062772 | -0.954246 | -0.189813 |
| H | -4.104277 | 0.236105 | -1.079283 |
| H | -2.533944 | -1.109516 | 0.221665 |
| H | -3.484239 | -0.899156 | 1.707152 |
| H | -2.034457 | 1.330958 | 0.191960 |
| H | -2.095180 | 7.812032 | 2.395693 |
| H | -3.148177 | 7.653510 | 0.967748 |
| H | -1.990911 | 4.010953 | 0.333100 |
| H | -3.092416 | 5.233668 | -0.324287 |
| H | -3.281165 | 4.002912 | 2.472616 |
| H | -8.941991 | 6.115077 | 5.700518 |
| H | -8.199280 | 7.714197 | 5.446231 |
| H | -7.085191 | 6.708390 | 7.412925 |
| H | -6.851197 | 5.185017 | 6.548033 |
| H | -4.696624 | 6.367787 | 6.502891 |
| H | -5.452141 | 7.866265 | 5.969264 |
| H | -5.289301 | 5.295624 | 4.312217 |
| H | -9.584819 | 5.929490 | 0.654606 |
| H | -8.113528 | 5.078906 | 0.058727 |
| H | -9.229711 | 4.275867 | 1.210543 |
| H | -1.141598 | 5.581833 | 2.026179 |
| H | -1.069680 | 6.410189 | 0.464526 |
| H | -0.904489 | -2.099660 | -3.987459 |
| H | -1.966230 | -0.659208 | -3.830973 |
| H | -0.206464 | -0.467546 | -4.132172 |

**d) L1-L1-L1 conformer**

|  | X | Y | Z |
| --- | --- | --- | --- |
| O | -10.986812 | 0.939989 | -0.913423 |
| O | 3.689188 | -2.369846 | 1.884936 |
| H | -6.923104 | 4.166950 | -3.661711 |
| H | -7.851206 | 4.498868 | -2.181741 |
| H | -9.829925 | 1.465404 | -3.733375 |
| H | -11.201606 | 3.539046 | -3.890507 |
| H | -10.568084 | 4.087412 | -2.331453 |
| H | -9.252262 | 5.215070 | -4.087598 |
| H | -8.969966 | 3.685377 | -4.925862 |
| H | -7.253391 | 0.637381 | -0.859769 |
| H | -5.580593 | -2.960108 | -0.621934 |
| H | -4.884840 | -2.260152 | -2.102081 |
| H | -7.254606 | -2.763050 | -2.589045 |
| H | -7.774349 | -1.966961 | -1.098004 |
| H | -8.178281 | -0.391043 | -2.933331 |
| H | -6.534461 | -0.610426 | -3.561642 |
| H | -3.506140 | 0.992784 | 0.075828 |
| H | -2.380022 | 3.066773 | 3.271792 |
| H | -3.163281 | 1.620194 | 3.950218 |
| H | -4.039777 | 3.204315 | 1.467915 |
| H | -4.954492 | 3.015155 | 2.970306 |
| H | -5.747852 | 1.480742 | 1.067301 |
| H | -5.285659 | 0.605568 | 2.536865 |
| H | -0.540864 | -0.767380 | 1.768686 |
| H | 2.762311 | -1.683888 | -0.271757 |
| H | 2.818063 | 0.088198 | -0.104014 |
| H | 1.019773 | -0.436568 | -1.723895 |
| H | 0.341365 | -1.650828 | -0.630102 |
| H | -1.041297 | 0.364833 | -0.406830 |
| H | 0.388071 | 1.390206 | -0.197704 |
| H | 4.520769 | -1.792096 | 4.310533 |
| H | 3.182988 | -1.702421 | 5.503400 |
| H | 3.343154 | -3.122125 | 4.416962 |
| H | -13.617505 | 1.321505 | -1.135270 |
| H | -14.219257 | 0.894419 | -2.772625 |
| H | -13.181349 | -0.247904 | -1.854668 |

|  | X | Y | Z |
| --- | --- | --- | --- |
| C | -0.024164 | 0.391880 | -0.002895 |
| C | -0.055598 | 0.182823 | 1.522916 |
| O | 1.291628 | 0.167811 | 2.023085 |
| N | 1.929815 | -0.971453 | 1.478583 |
| C | 2.200187 | -0.808024 | 0.054412 |
| C | 0.853900 | -0.681373 | -0.668164 |
| C | -0.747665 | 1.340315 | 2.246306 |
| O | -0.144789 | 2.237002 | 2.812397 |
| C | 2.833249 | -1.609223 | 2.305001 |
| O | 2.606157 | -1.343443 | 3.605397 |
| C | 3.474439 | -2.040166 | 4.508182 |
| N | -2.126446 | 1.362362 | 2.145695 |
| O | -2.743746 | 0.133672 | 1.805270 |
| C | -3.859053 | 0.419883 | 0.940585 |
| C | -4.905788 | 1.233710 | 1.721075 |
| C | -4.261612 | 2.509528 | 2.287796 |
| C | -2.959733 | 2.176716 | 3.023806 |
| C | -4.383074 | -0.947589 | 0.493520 |
| O | -4.078258 | -1.993948 | 1.041079 |
| N | -5.300107 | -0.920901 | -0.540487 |
| O | -5.272860 | 0.245817 | -1.344636 |
| C | -6.621052 | 0.545179 | -1.750411 |
| C | -7.141391 | -0.590723 | -2.647490 |
| C | -7.033813 | -1.934128 | -1.906893 |
| C | -5.634482 | -2.115925 | -1.310556 |
| C | -6.526099 | 1.893018 | -2.471890 |
| O | -5.469673 | 2.396703 | -2.812920 |
| N | -7.735498 | 2.489811 | -2.782346 |
| C | -7.829307 | 3.911582 | -3.111094 |
| C | -9.100077 | 4.140767 | -3.935862 |
| C | -10.322779 | 3.521381 | -3.239330 |
| C | -10.009430 | 2.072758 | -2.833954 |
| O | -8.837418 | 2.044232 | -2.007222 |
| C | -11.114445 | 1.410823 | -2.017828 |
| O | -12.263009 | 1.415623 | -2.723931 |
| C | -13.391288 | 0.802731 | -2.069983 |

**e) R1-R1-R1 conformer**

|  | X | Y | Z |
| --- | --- | --- | --- |
| C | -1.818619 | 2.626053 | -2.184982 |
| C | -0.702148 | 3.482071 | -1.567215 |
| O | -0.906982 | 3.627350 | -0.148834 |
| N | -2.123993 | 4.360443 | 0.048874 |
| C | -3.270432 | 3.520493 | -0.309860 |
| C | -3.188705 | 3.212051 | -1.808655 |
| C | 0.692032 | 2.924057 | -1.865341 |
| O | 1.321045 | 3.359253 | -2.825043 |
| C | -2.160126 | 5.010681 | 1.292221 |
| O | -1.038544 | 5.640884 | 1.689255 |
| C | -0.037323 | 6.088821 | 0.764557 |
| N | 1.207504 | 1.929398 | -1.080551 |
| O | 0.397156 | 1.266891 | -0.145676 |
| C | 1.040359 | 1.362732 | 1.150452 |
| C | 2.381897 | 0.614609 | 1.107635 |
| C | 3.262115 | 1.168640 | -0.024780 |
| C | 2.468506 | 1.247833 | -1.336014 |
| C | 0.134323 | 0.868271 | 2.284698 |
| O | 0.076324 | 1.513062 | 3.324982 |
| N | -0.486938 | -0.348282 | 2.175461 |
| O | -0.423553 | -1.074631 | 0.981583 |
| C | -1.703232 | -0.981949 | 0.294724 |
| C | -2.813171 | -1.597366 | 1.157242 |
| C | -2.842331 | -0.906311 | 2.530975 |
| C | -1.434814 | -0.883331 | 3.144165 |
| C | -1.546326 | -1.594482 | -1.098679 |
| O | -1.885818 | -0.966690 | -2.097595 |
| N | -1.023987 | -2.852448 | -1.199905 |
| C | -0.757767 | -3.565933 | -2.439270 |
| C | 0.692047 | -4.073303 | -2.413177 |
| C | 0.984711 | -4.816895 | -1.100494 |
| C | 0.528763 | -3.974152 | 0.098160 |
| O | -0.864578 | -3.635941 | -0.048203 |
| C | 0.737442 | -4.710541 | 1.416428 |
| O | -0.292221 | -4.592224 | 2.268082 |
| C | -0.121200 | -5.271149 | 3.528793 |

|  | X | Y | Z |
| --- | --- | --- | --- |
| O | 1.759552 | -5.316345 | 1.655090 |
| O | -3.171051 | 5.058594 | 1.959106 |
| H | -4.171387 | 4.081436 | -0.058792 |
| H | -3.259750 | 2.600906 | 0.293106 |
| H | -3.986130 | 2.512833 | -2.084656 |
| H | -3.360825 | 4.142258 | -2.365311 |
| H | -1.690353 | 2.609802 | -3.273178 |
| H | -1.732407 | 1.592224 | -1.835464 |
| H | -0.705338 | 4.479858 | -2.020615 |
| H | -0.476547 | 6.327774 | -0.207993 |
| H | 0.384186 | 6.992920 | 1.209793 |
| H | 0.742569 | 5.335770 | 0.639877 |
| H | 2.986526 | 1.820023 | -2.106445 |
| H | 2.252716 | 0.243286 | -1.725830 |
| H | 4.148743 | 0.539261 | -0.163559 |
| H | 3.612656 | 2.174713 | 0.238098 |
| H | 2.882584 | 0.715744 | 2.077148 |
| H | 2.180130 | -0.450348 | 0.943573 |
| H | 1.193741 | 2.423248 | 1.370087 |
| H | -1.374222 | -0.245605 | 4.026703 |
| H | -1.109558 | -1.898041 | 3.404587 |
| H | -3.531937 | -1.426804 | 3.205566 |
| H | -3.202454 | 0.125427 | 2.428177 |
| H | -3.773529 | -1.478256 | 0.641479 |
| H | -2.620239 | -2.667328 | 1.275742 |
| H | -1.903015 | 0.078049 | 0.114822 |
| H | -0.941910 | -2.863510 | -3.253113 |
| H | -1.464951 | -4.401642 | -2.526443 |
| H | 0.870392 | -4.731079 | -3.271271 |
| H | 1.368622 | -3.214798 | -2.513336 |
| H | 2.048859 | -5.045700 | -0.995438 |
| H | 0.441544 | -5.770370 | -1.078720 |
| H | 1.101715 | -3.038574 | 0.155884 |
| H | 0.734726 | -4.860123 | 4.069519 |
| H | -1.045914 | -5.097198 | 4.078339 |
| H | 0.037643 | -6.339844 | 3.366379 |

**B. Low energy conformers of Nip-tetramer.**

**a) L2-L2-L2 conformer**

|  | X | Y | Z |
| --- | --- | --- | --- |
| C | -1.683685 | 2.921783 | -3.075104 |
| C | -1.334518 | 3.180283 | -1.596481 |
| C | -0.608459 | 4.542694 | -1.478058 |
| N | 0.581055 | 4.558472 | -2.328171 |
| C | 0.287476 | 4.378128 | -3.755402 |
| C | -0.448349 | 3.048553 | -3.982498 |
| C | -2.599487 | 3.134506 | -0.726822 |
| O | -3.704300 | 3.320557 | -1.234695 |
| C | 1.871902 | 5.052780 | -1.978622 |
| O | 2.955475 | 4.974976 | -2.859085 |
| N | -2.455307 | 2.884018 | 0.617920 |
| C | -1.204544 | 2.708984 | 1.351654 |
| C | -1.132492 | 1.311493 | 2.021622 |
| C | -2.379517 | 1.087082 | 2.895905 |
| C | -3.670395 | 1.349930 | 2.107529 |
| C | -3.653702 | 2.735336 | 1.449585 |
| C | 0.147415 | 1.227905 | 2.871460 |
| O | 0.096786 | 1.462524 | 4.077316 |
| N | 1.337769 | 0.919357 | 2.250137 |
| C | 1.551300 | 0.779312 | 0.811600 |
| C | 2.406235 | -0.472916 | 0.488998 |
| C | 3.724625 | -0.435135 | 1.280533 |
| C | 3.444900 | -0.253540 | 2.778259 |
| C | 2.576111 | 0.980300 | 3.036316 |
| C | 2.676529 | -0.505035 | -1.021240 |
| O | 3.675827 | 0.052063 | -1.478592 |
| N | 1.775055 | -1.138565 | -1.846024 |
| C | 2.013916 | -1.137909 | -3.293839 |
| C | 1.925385 | -2.560135 | -3.858246 |
| C | 0.597687 | -3.233841 | -3.485016 |
| C | 0.372757 | -3.167816 | -1.957993 |
| C | 0.492020 | -1.717957 | -1.455872 |
| C | -0.971375 | -3.747696 | -1.550812 |
| O | -1.076569 | -5.043594 | -1.911652 |
| C | -2.320709 | -5.682358 | -1.571487 |
| O | -1.847382 | -3.138489 | -0.972855 |
| O | 1.881104 | 5.211151 | -0.597504 |
| C | 3.116241 | 5.736984 | -0.076248 |
| H | 0.361542 | -1.683838 | -0.376816 |
| H | -0.324387 | -1.123627 | -1.891190 |

|  | X | Y | Z |
| --- | --- | --- | --- |
| H | 2.994522 | -0.694519 | -3.462112 |
| H | 1.260100 | -0.496185 | -3.777298 |
| H | 2.036697 | -2.524368 | -4.948730 |
| H | 2.763687 | -3.151215 | -3.466995 |
| H | 0.577300 | -4.275070 | -3.820465 |
| H | -0.231567 | -2.716568 | -3.989349 |
| H | 1.152023 | -3.773834 | -1.474518 |
| H | 2.290237 | 1.067230 | 4.083847 |
| H | 3.128708 | 1.890579 | 2.755417 |
| H | 4.388275 | -0.150116 | 3.328217 |
| H | 2.935120 | -1.140381 | 3.178696 |
| H | 4.295258 | -1.353867 | 1.099594 |
| H | 4.335129 | 0.392014 | 0.902588 |
| H | 1.844650 | -1.357269 | 0.809418 |
| H | -0.346802 | 2.882294 | 0.704025 |
| H | -1.157196 | 3.468231 | 2.146500 |
| H | -4.519272 | 2.894821 | 0.807465 |
| H | -3.645767 | 3.519028 | 2.222290 |
| H | -2.372620 | 0.066925 | 3.296860 |
| H | -2.317749 | 1.757600 | 3.760025 |
| H | -1.126511 | 0.555588 | 1.226852 |
| H | -0.300720 | 4.763641 | -0.456802 |
| H | -1.280914 | 5.341309 | -1.814880 |
| H | 1.218002 | 4.428406 | -4.318893 |
| H | -0.344925 | 5.218719 | -4.070389 |
| H | -0.744675 | 2.967270 | -5.036041 |
| H | 0.254425 | 2.226669 | -3.783752 |
| H | -2.136261 | 1.929398 | -3.182892 |
| H | -2.454407 | 3.639359 | -3.377716 |
| H | -0.628922 | 2.408890 | -1.263535 |
| H | 3.386826 | 6.663971 | -0.588577 |
| H | 2.916824 | 5.932983 | 0.978287 |
| H | 3.919296 | 5.004608 | -0.184402 |
| H | -3.801102 | 0.589981 | 1.325378 |
| H | -4.538589 | 1.275726 | 2.774384 |
| H | -3.157852 | -5.171509 | -2.053848 |
| H | -2.232010 | -6.705688 | -1.936493 |
| H | -2.472870 | -5.670822 | -0.489090 |
| H | 0.590775 | 0.710785 | 0.301163 |
| H | 2.061996 | 1.671463 | 0.423553 |

**(b) L2-L2-L1 conformer**

|  | X | Y | Z |
| --- | --- | --- | --- |
| C | 1.654861 | -0.270447 | -3.045486 |
| N | 1.539307 | -0.347305 | -1.585190 |
| C | 1.774963 | -1.681259 | -1.037079 |
| C | 3.171722 | -2.192245 | -1.437042 |
| C | 3.349655 | -2.154022 | -2.971558 |
| C | 3.033615 | -0.752426 | -3.511612 |
| C | 1.226105 | 0.786163 | -0.876129 |
| O | 1.060898 | 1.870102 | -1.444077 |
| C | 3.398041 | -3.586121 | -0.876343 |
| O | 2.562912 | -4.252319 | -0.301132 |
| C | 1.090958 | 0.689545 | 0.648422 |
| C | 0.184280 | 1.833694 | 1.146347 |
| N | 0.048843 | 1.790527 | 2.602783 |
| C | 1.321808 | 1.882278 | 3.324524 |
| C | 2.280396 | 0.773834 | 2.880341 |
| C | 2.463104 | 0.766418 | 1.355911 |
| C | -1.123627 | 1.924515 | 3.314240 |
| O | -1.124680 | 2.020752 | 4.540070 |
| C | -2.446045 | 1.981613 | 2.534790 |
| C | -2.674820 | 3.419769 | 1.998886 |
| N | -3.947006 | 3.514969 | 1.288513 |
| C | -5.107346 | 3.186264 | 2.121948 |
| C | -4.969620 | 1.766861 | 2.690338 |
| C | -3.633469 | 1.574341 | 3.425278 |
| C | -4.121933 | 3.699219 | -0.065170 |
| O | -5.241394 | 3.709137 | -0.574800 |
| C | -2.873993 | 3.927185 | -0.927948 |
| C | -2.375458 | 5.388519 | -0.809677 |
| N | -1.190063 | 5.591507 | -1.640045 |
| C | -1.419754 | 5.339096 | -3.069031 |
| C | -1.924255 | 3.903381 | -3.282120 |
| C | -3.154221 | 3.605484 | -2.407700 |
| C | 0.026900 | 5.371094 | -1.045578 |
| O | 1.041565 | 5.414200 | -1.941910 |
| C | 2.334564 | 5.090744 | -1.412338 |
| O | 0.192657 | 5.196167 | 0.156387 |
| O | 4.662094 | -4.003326 | -1.100220 |
| C | 4.975052 | -5.321198 | -0.613983 |
| H | 1.674728 | -1.678452 | 0.045883 |
| H | 1.015900 | -2.374466 | -1.424881 |

|  | X | Y | Z |
| --- | --- | --- | --- |
| H | 1.468109 | 0.763138 | -3.333908 |
| H | 0.869583 | -0.900925 | -3.489944 |
| H | 3.066100 | -0.753586 | -4.607864 |
| H | 3.795532 | -0.041168 | -3.166458 |
| H | 4.367523 | -2.456726 | -3.235504 |
| H | 2.667297 | -2.886627 | -3.426682 |
| H | 3.930511 | -1.531830 | -0.994202 |
| H | 1.097870 | 1.822159 | 4.389084 |
| H | 1.773636 | 2.866913 | 3.125732 |
| H | 3.249100 | 0.913422 | 3.375778 |
| H | 1.885590 | -0.196609 | 3.209503 |
| H | 3.108383 | -0.067505 | 1.053513 |
| H | 2.966965 | 1.689255 | 1.036255 |
| H | 0.607361 | -0.253723 | 0.929733 |
| H | -1.850266 | 3.753281 | 1.371155 |
| H | -2.707947 | 4.102295 | 2.860275 |
| H | -5.997116 | 3.291183 | 1.501862 |
| H | -5.164841 | 3.916595 | 2.942459 |
| H | -3.518600 | 0.533325 | 3.749069 |
| H | -3.606079 | 2.183228 | 4.335815 |
| H | -2.414169 | 1.305237 | 1.671875 |
| H | -2.124069 | 5.659546 | 0.215103 |
| H | -3.162140 | 6.067291 | -1.162200 |
| H | -0.496689 | 5.528442 | -3.614639 |
| H | -2.171860 | 6.061340 | -3.413910 |
| H | -2.170120 | 3.755798 | -4.341736 |
| H | -1.109375 | 3.208817 | -3.036163 |
| H | -3.450882 | 2.555405 | -2.511154 |
| H | -4.014282 | 4.199387 | -2.737747 |
| H | -2.057114 | 3.280746 | -0.587677 |
| H | 2.368942 | 4.031906 | -1.144653 |
| H | 3.036484 | 5.301880 | -2.220993 |
| H | 2.560928 | 5.706177 | -0.538544 |
| H | -5.052673 | 1.049545 | 1.862411 |
| H | -5.805511 | 1.565430 | 3.372040 |
| H | 4.331619 | -6.067291 | -1.087311 |
| H | 6.018845 | -5.489456 | -0.879471 |
| H | 4.839935 | -5.371048 | 0.469528 |
| H | -0.792068 | 1.742905 | 0.675262 |
| H | 0.599228 | 2.799591 | 0.836975 |

**(c) L2-L1-L1 conformer**

|  | X | Y | Z |
| --- | --- | --- | --- |
| C | 0.375916 | -5.234177 | -2.848465 |
| N | 0.232590 | -4.405182 | -1.645218 |
| C | -0.576614 | -5.011230 | -0.595444 |
| C | 0.003784 | -6.388184 | -0.179047 |
| C | 0.156967 | -7.302948 | -1.401535 |
| C | 0.969589 | -6.604294 | -2.500626 |
| C | 0.902679 | -3.205612 | -1.572723 |
| O | 1.616287 | -2.810745 | -2.493866 |
| C | -0.866333 | -7.017334 | 0.898819 |
| O | -0.844223 | -6.269882 | 2.028122 |
| C | -1.647018 | -6.766052 | 3.114685 |
| C | 0.753174 | -2.351059 | -0.307144 |
| C | 1.020966 | -0.873383 | -0.667664 |
| N | 0.941650 | -0.027466 | 0.521820 |
| C | 1.886597 | -0.397217 | 1.579254 |
| C | 1.679245 | -1.854523 | 2.005157 |
| C | 1.733566 | -2.804489 | 0.799927 |
| C | 0.117645 | 1.054993 | 0.710236 |
| O | 0.145874 | 1.710800 | 1.754440 |
| C | -0.861023 | 1.439728 | -0.406967 |
| C | -1.277008 | 2.914124 | -0.225632 |
| N | -2.214600 | 3.317444 | -1.272827 |
| C | -3.448380 | 2.530457 | -1.301117 |
| C | -3.132919 | 1.038406 | -1.464432 |
| C | -2.127014 | 0.551559 | -0.409271 |
| C | -2.067474 | 4.369476 | -2.150864 |
| O | -2.947739 | 4.665253 | -2.956985 |
| C | -0.770600 | 5.183060 | -2.075623 |
| C | -0.818344 | 6.188797 | -0.898285 |
| N | 0.438217 | 6.929413 | -0.813354 |
| C | 0.738007 | 7.722260 | -2.009583 |
| C | 0.760100 | 6.826706 | -3.259888 |
| C | -0.508300 | 5.961823 | -3.377457 |
| C | 1.492294 | 6.480072 | -0.053986 |
| O | 2.626724 | 6.925446 | -0.089706 |
| O | 1.107300 | 5.464325 | 0.770691 |
| C | 2.120331 | 4.956268 | 1.650269 |
| O | -1.509995 | -8.036774 | 0.784988 |
| H | 0.077850 | 4.511292 | -1.896927 |
| H | -1.383072 | 6.587112 | -3.590195 |

|  | X | Y | Z |
| --- | --- | --- | --- |
| H | -0.417786 | 5.267090 | -4.220245 |
| H | 0.873962 | 7.451279 | -4.154877 |
| H | 1.648163 | 6.182068 | -3.206894 |
| H | 1.696213 | 8.218323 | -1.853256 |
| H | -0.039352 | 8.492172 | -2.105133 |
| H | -0.371704 | 1.356155 | -1.385544 |
| H | -2.582245 | 0.599182 | 0.590118 |
| H | -1.870392 | -0.499344 | -0.588638 |
| H | -4.062637 | 0.460007 | -1.394165 |
| H | -2.722961 | 0.869934 | -2.469147 |
| H | -4.059082 | 2.907440 | -2.121140 |
| H | -3.996750 | 2.693771 | -0.360016 |
| H | -0.270035 | -2.411240 | 0.083755 |
| H | 2.748016 | -2.813278 | 0.377548 |
| H | 1.513809 | -3.830353 | 1.118469 |
| H | 2.445663 | -2.132050 | 2.739258 |
| H | 0.705658 | -1.944412 | 2.505142 |
| H | 1.736511 | 0.292725 | 2.408844 |
| H | 2.910034 | -0.262543 | 1.196594 |
| H | 0.988922 | -6.198776 | 0.269119 |
| H | -0.841949 | -7.561066 | -1.775940 |
| H | 0.627350 | -8.246964 | -1.106277 |
| H | 0.997833 | -7.226273 | -3.403351 |
| H | 2.008347 | -6.467560 | -2.171783 |
| H | 1.003723 | -4.684219 | -3.548447 |
| H | -0.619507 | -5.362076 | -3.300156 |
| H | -1.307114 | -7.759674 | 3.417572 |
| H | -2.697952 | -6.824768 | 2.819839 |
| H | -1.514587 | -6.050674 | 3.926605 |
| H | 3.041200 | 4.752975 | 1.098633 |
| H | 1.701797 | 4.037903 | 2.064423 |
| H | 2.334244 | 5.678055 | 2.444458 |
| H | -1.754898 | 3.027512 | 0.755386 |
| H | -0.399490 | 3.554840 | -0.215073 |
| H | 2.020294 | -0.793335 | -1.111100 |
| H | 0.312225 | -0.540833 | -1.423447 |
| H | -1.624741 | 6.910110 | -1.083237 |
| H | -1.014816 | 5.707123 | 0.057236 |
| H | -1.600388 | -5.157211 | -0.973648 |
| H | -0.636276 | -4.358505 | 0.272293 |

**(d) L2-L1-L1 conformer**

|  | X | Y | Z |
| --- | --- | --- | --- |
| C | 1.100708 | -5.295410 | -2.568558 |
| N | 0.942108 | -4.636475 | -1.267761 |
| C | 0.069611 | -5.347992 | -0.337723 |
| C | 0.581863 | -6.780579 | -0.096283 |
| C | 0.757553 | -7.534210 | -1.434525 |
| C | 1.635406 | -6.721375 | -2.395676 |
| C | 1.586975 | -3.442627 | -1.043518 |
| O | 2.307602 | -2.929718 | -1.899628 |
| C | -0.353821 | -7.515366 | 0.848785 |
| O | 0.136459 | -8.729187 | 1.177673 |
| C | -0.684937 | -9.509079 | 2.065460 |
| C | 1.416748 | -2.753281 | 0.316055 |
| C | 1.668045 | -1.238632 | 0.145400 |
| N | 1.582764 | -0.547882 | 1.430450 |
| C | 2.526413 | -1.042282 | 2.437317 |
| C | 2.328033 | -2.543045 | 2.677094 |
| C | 2.398682 | -3.331268 | 1.361694 |
| C | 0.731216 | 0.478333 | 1.764389 |
| O | 0.732315 | 0.976746 | 2.890564 |
| C | -0.257111 | 0.993073 | 0.710861 |
| C | -0.593689 | 2.471039 | 1.012268 |
| N | -1.594482 | 2.976440 | 0.075211 |
| C | -2.853210 | 2.226563 | 0.088547 |
| C | -2.607407 | 0.746674 | -0.225952 |
| C | -1.551712 | 0.147186 | 0.713623 |
| C | -1.442459 | 4.003464 | -0.826996 |
| O | -2.334579 | 4.295395 | -1.624359 |
| C | -0.125870 | 4.788879 | -0.842743 |
| C | -0.399155 | 6.224762 | -1.339737 |
| N | 0.851929 | 6.970581 | -1.459412 |
| C | 1.845993 | 6.384430 | -2.353943 |
| C | 2.181168 | 4.952728 | -1.916824 |
| C | 0.909912 | 4.102798 | -1.766571 |
| C | 1.195618 | 8.053284 | -0.699677 |
| O | 2.265823 | 8.640030 | -0.754684 |
| O | 0.187592 | 8.423752 | 0.140915 |
| C | 0.480743 | 9.571487 | 0.944992 |
| O | -1.408798 | -7.082932 | 1.264313 |
| H | 0.296646 | 4.870255 | 0.165253 |
| H | 0.444290 | 3.954025 | -2.750793 |

|  | X | Y | Z |
| --- | --- | --- | --- |
| H | 1.165726 | 3.106200 | -1.385620 |
| H | 2.856903 | 4.493300 | -2.649185 |
| H | 2.718918 | 4.991211 | -0.960052 |
| H | 2.726517 | 7.026733 | -2.342270 |
| H | 1.437149 | 6.376144 | -3.375671 |
| H | 0.182388 | 0.958511 | -0.292709 |
| H | -1.940475 | 0.118744 | 1.741089 |
| H | -1.333847 | -0.889893 | 0.430237 |
| H | -3.550034 | 0.192230 | -0.137772 |
| H | -2.274734 | 0.655670 | -1.268494 |
| H | -3.517731 | 2.689560 | -0.640030 |
| H | -3.305527 | 2.324844 | 1.087067 |
| H | 0.393219 | -2.874878 | 0.690720 |
| H | 3.414795 | -3.274170 | 0.947006 |
| H | 2.191513 | -4.393127 | 1.541992 |
| H | 3.092728 | -2.904388 | 3.375671 |
| H | 1.352371 | -2.702118 | 3.155029 |
| H | 2.369232 | -0.461807 | 3.345688 |
| H | 3.550049 | -0.855759 | 2.077896 |
| H | 1.565674 | -6.727737 | 0.391068 |
| H | -0.232620 | -7.692535 | -1.886307 |
| H | 1.187347 | -8.523376 | -1.249542 |
| H | 1.680023 | -7.214432 | -3.374329 |
| H | 2.662491 | -6.672653 | -2.010757 |
| H | 1.772369 | -4.679352 | -3.165161 |
| H | 0.120056 | -5.323074 | -3.068253 |
| H | -1.664536 | -9.694443 | 1.617554 |
| H | -0.821686 | -8.987869 | 3.016495 |
| H | -0.146332 | -10.445114 | 2.214066 |
| H | 1.349533 | 9.388855 | 1.583328 |
| H | -0.411209 | 9.734451 | 1.552124 |
| H | 0.681107 | 10.445114 | 0.318817 |
| H | -0.976593 | 2.545151 | 2.036469 |
| H | 0.312012 | 3.073318 | 0.967438 |
| H | 2.664764 | -1.092300 | -0.286743 |
| H | 0.952148 | -0.824326 | -0.561752 |
| H | -0.888214 | 6.174744 | -2.318802 |
| H | -1.067963 | 6.751160 | -0.662430 |
| H | -0.946487 | -5.398087 | -0.753174 |
| H | -0.003708 | -4.815964 | 0.608276 |

**(e) R1-R1-R1 conformer**

|  | X | Y | Z |
| --- | --- | --- | --- |
| C | -2.091202 | -4.945572 | -2.637985 |
| N | -2.024445 | -4.419876 | -1.267288 |
| C | -1.677826 | -5.429459 | -0.276779 |
| C | -0.308411 | -6.078674 | -0.611008 |
| C | -0.319534 | -6.655930 | -2.032990 |
| C | -0.760330 | -5.589523 | -3.046539 |
| C | -2.066223 | -3.055542 | -1.078873 |
| O | -2.156906 | -2.287170 | -2.035873 |
| C | 0.034851 | -7.127945 | 0.434387 |
| O | 0.079636 | -8.324326 | 0.253250 |
| C | -2.027328 | -2.435883 | 0.331543 |
| C | -0.628723 | -2.476944 | 1.000961 |
| N | -0.622757 | -1.631821 | 2.190048 |
| C | -1.617081 | -2.043091 | 3.189453 |
| C | -3.035568 | -2.006729 | 2.603439 |
| C | -3.136124 | -2.852966 | 1.321960 |
| C | -0.040421 | -0.386963 | 2.319702 |
| O | -0.309982 | 0.335129 | 3.278061 |
| C | 0.991211 | 0.128891 | 1.297638 |
| C | 0.385086 | 0.555206 | -0.065400 |
| N | 1.391113 | 1.253342 | -0.857391 |
| C | 2.589233 | 0.448349 | -1.117400 |
| C | 3.255569 | 0.015182 | 0.194611 |
| C | 2.264175 | -0.724335 | 1.108871 |
| C | 1.364700 | 2.562027 | -1.296371 |
| O | 2.324800 | 3.038940 | -1.898529 |
| C | 0.132202 | 3.459732 | -1.072830 |
| C | -0.127274 | 3.854507 | 0.402573 |
| N | -1.205231 | 4.838959 | 0.461914 |
| C | -2.467224 | 4.445358 | -0.161346 |
| C | -2.251114 | 4.075638 | -1.633652 |
| C | -1.161880 | 3.001648 | -1.782928 |
| C | -1.128067 | 6.039749 | 1.114105 |
| O | -2.035873 | 6.852127 | 1.195282 |
| O | 0.271957 | -6.544540 | 1.634781 |
| C | 0.593231 | -7.447250 | 2.708649 |
| O | 0.099884 | 6.235825 | 1.669098 |
| C | 0.248932 | 7.485138 | 2.353012 |
| H | -2.355865 | -4.116669 | -3.292800 |
| H | -2.895493 | -5.695023 | -2.673172 |

|  | X | Y | Z |
| --- | --- | --- | --- |
| H | -2.452560 | -6.210938 | -0.279953 |
| H | -1.652237 | -5.000443 | 0.720078 |
| H | 0.448517 | -5.286163 | -0.535645 |
| H | 0.670776 | -7.050034 | -2.286179 |
| H | -1.007050 | -7.510986 | -2.059723 |
| H | -0.863205 | -6.035416 | -4.043152 |
| H | 0.002686 | -4.803619 | -3.124283 |
| H | -2.203476 | -1.380219 | 0.099900 |
| H | -0.355637 | -3.495682 | 1.306885 |
| H | 0.126266 | -2.142090 | 0.293991 |
| H | -1.520767 | -1.373779 | 4.043167 |
| H | -1.369339 | -3.065277 | 3.511978 |
| H | -3.751144 | -2.367508 | 3.352448 |
| H | -3.297089 | -0.963684 | 2.384262 |
| H | -4.117615 | -2.720276 | 0.851700 |
| H | -3.060364 | -3.913803 | 1.589844 |
| H | 1.311279 | 1.062180 | 1.772751 |
| H | 0.027252 | -0.306793 | -0.645035 |
| H | -0.473450 | 1.198669 | 0.106796 |
| H | 3.258774 | 1.051498 | -1.729004 |
| H | 2.291183 | -0.439072 | -1.697617 |
| H | 4.117615 | -0.626144 | -0.027390 |
| H | 3.639191 | 0.906800 | 0.706665 |
| H | 2.718994 | -0.926758 | 2.085922 |
| H | 2.031403 | -1.700394 | 0.665329 |
| H | 0.447540 | 4.384338 | -1.567123 |
| H | -0.408020 | 2.989502 | 1.020309 |
| H | 0.770981 | 4.290344 | 0.836731 |
| H | -3.163116 | 5.276900 | -0.049835 |
| H | -2.880814 | 3.580124 | 0.382507 |
| H | -3.195984 | 3.719635 | -2.062607 |
| H | -1.961319 | 4.977829 | -2.187775 |
| H | -0.950470 | 2.816025 | -2.842621 |
| H | -1.536041 | 2.056381 | -1.371124 |
| H | 1.495712 | -8.016281 | 2.471298 |
| H | 0.755920 | -6.816513 | 3.582886 |
| H | -0.230392 | -8.144455 | 2.883331 |
| H | 0.101669 | 8.324326 | 1.667587 |
| H | -0.470000 | 7.567810 | 3.172516 |
| H | 1.269470 | 7.483047 | 2.739029 |

**C. Relative energies (kcal/mol) of low energy conformers of Oxa- and Nip-tetramers.**

**a) Oxa-tetramer**

|  |  | ***Eel*** |  |  |  | ****-angles** |  |  |
| --- | --- | --- | --- | --- | --- | --- | --- | --- |
|  |  |  | **Upper** |  | **Middle** |  | **Lower** |
| **L2-L2-L2** |  | 0.00 |  | -75 |  | -86 |  | -85 |
| **L2-L2-L1** |  | 1.57 |  | -76 |  | -87 |  | -169 |
| **L1-L2-L2** |  | 1.26 |  | -163 |  | -92 |  | -88 |
| **L1-L1-L2** |  | 3.81 |  | -166 |  | -165 |  | -101 |
| **L1-L2-L1** |  | 3.40 |  | -162 |  | -101 |  | -169 |
| **L2-L1-L1** |  | 4.81 |  | -78 |  | -159 |  | -171 |
| **L1-L1-L1** |  | 5.27 |  | -166 |  | -169 |  | -171 |
| **R1-R1-R1** |  | 11.37 |  | 41 |  | 50 |  | 52 |

**b) Nip-tetramer**

|  |  | ***Eel*** |  |  |  | ****-angles** |  |  |
| --- | --- | --- | --- | --- | --- | --- | --- | --- |
|  |  |  | **Upper** |  | **Middle** |  | **Lower** |
| **L2-L2-L2** |  | 0.00 |  | -80 |  | -82 |  | -89 |
| **L2-L2-L1** |  | 0.06 |  | -78 |  | -82 |  | -156 |
| **L2-L1-L2** |  | 1.35 |  | -82 |  | -151 |  | -93 |
| **L1-L2-L2** |  | 0.77 |  | -139 |  | -82 |  | -88 |
| **L1-L1-L2** |  | 1.14 |  | -152 |  | -148 |  | -87 |
| **L1-L2-L1** |  | 1.18 |  | -156 |  | -91 |  | -163 |
| **L2-L1-L1** |  | 1.15 |  | -79 |  | -159 |  | -155 |
| **L1-L1-L1** |  | 1.16 |  | -152 |  | -153 |  | -155 |
| **R1-R1-R1** |  | 17.21 |  | 77 |  | 74 |  | 75 |
